# Supplementary material
Source: publisher site journal article supplement (https://static.cambridge.org/content/id/urn:cambridge.org:id:article:S1041610219002175/resource/name/S1041610219002175supp001.docx)
Supplement: Supplementary file 1 [file S1041610219002175supp001.docx]

**Supplemental Table 1. MCI type at first visit with MCI among participants who progressed from normal cognition to MCI**

| MCI type | **Non-Latinos** | | | | | **Latinos** | | | **Total Participants** |
| --- | --- | --- | --- | --- | --- | --- | --- | --- | --- |
| **White** | **AA** | **AIAN** | **AsA** | **AA+** | **Caribbean** | **Mexican** | **Central/South American** |
| Amnestic MCI - single domain | 598 (44.2) | 94 (41.4) | 9 (56.3) | 10 (31.3) | 6 (26.1) | 9 (34.6) | 10 (30.3) | 7 (28.0) | 743 |
| Amnestic MCI - multiple domain | 501 (37.0) | 70 (30.8) | 4 (25.0) | 13 (40.6) | 10 (43.5) | 12 (46.2) | 9 (27.3) | 12 (48.0) | 631 |
| Non-amnestic MCI - single domain | 187 (13.8) | 41 (18.1) | 3 (18.8) | 6 (18.8) | 7 (30.4) | 3 (11.5) | 11 (33.3) | 4 (16.0) | 262 |
| Non-amnestic MCI - multiple domain | 68 (5.0) | 22 (9.7) | 0 (0.0) | 3 (9.4) | 0 (0.0) | 2 (7.7) | 3 (9.1) | 2 (8.0) | 100 |
| Total MCI events for participants who progressed from normal cognition to MCI | 1354 | 227 | 16 | 32 | 23 | 26 | 33 | 25 | 1736 |

AA: African American; AIAN: American Indians and Alaska Natives; AsA: Asian Americans; AA+: Individuals simultaneously identifying as African American and another minority race
